# Supplementary material for: Tradeoffs of microbial life history strategies drive the turnover of microbial-derived organic carbon in coastal saline soils
Source: Front Microbiol. 2023 Mar 23;14:1141436. doi: 10.3389/fmicb.2023.1141436 (PMC10076556; doi:10.3389/fmicb.2023.1141436)
Supplement: Supplementary file 6 [file Data_Sheet_1.xlsx]

## Sheet: Sheet1
Gene	Strategy	Functional category	KO	KO_description	KEGG level 1	KEGG level 2	KEGG level 3	Number of reads				P value (HS vs LS)
								HSC	HSCNP	LSC	LSCNP
cbbL	Growth yield	C cycle	K01601	rbcL, cbbL; ribulose-bisphosphate carboxylase large chain [EC:4.1.1.39]	Metabolism	Energy metabolism	Carbon fixation in photosynthetic organisms	20.5766	20.2666	28.2293	27.3712	<0.001	***
rbcS	Growth yield	C cycle	K01602	rbcS, cbbS; ribulose-bisphosphate carboxylase small chain [EC:4.1.1.39]	Metabolism	Energy metabolism	Carbon fixation in photosynthetic organisms	2.96238	3.2011	5.79095	3.1851	0.041	*
nifJ	Growth yield	C cycle	K03737	por, nifJ; pyruvate-ferredoxin/flavodoxin oxidoreductase [EC:1.2.7.1 1.2.7.-]	Metabolism	Energy metabolism	Carbon fixation pathways in prokaryotes	161.504	157.718	280.805	272.664	<0.001	***
aclB	Growth yield	C cycle	K15231	aclB; ATP-citrate lyase beta-subunit [EC:2.3.3.8]	Metabolism	Energy metabolism	Carbon fixation pathways in prokaryotes	0.630875	0.607625	1.53127	1.05243	0.003	**
porA	Growth yield	C cycle	K00169	porA; pyruvate ferredoxin oxidoreductase alpha subunit [EC:1.2.7.1]	Metabolism	Xenobiotics biodegradation and metabolism	Nitrotoluene degradation	58.9183	59.3981	74.8417	73.6423	<0.001	***
porB	Growth yield	C cycle	K00170	porB; pyruvate ferredoxin oxidoreductase beta subunit [EC:1.2.7.1]	Metabolism	Xenobiotics biodegradation and metabolism	Nitrotoluene degradation	34.5107	38.7555	50.5695	48.1609	<0.001	***
porD	Growth yield	C cycle	K00171	porD; pyruvate ferredoxin oxidoreductase delta subunit [EC:1.2.7.1]	Metabolism	Xenobiotics biodegradation and metabolism	Nitrotoluene degradation	4.30255	4.35313	7.19845	7.22243	0.001	**
porC	Growth yield	C cycle	K00172	porC, porG; pyruvate ferredoxin oxidoreductase gamma subunit [EC:1.2.7.1]	Metabolism	Xenobiotics biodegradation and metabolism	Nitrotoluene degradation	12.9393	13.372	23.8338	21.4653	<0.001	***
ppc	Growth yield	C cycle	K01595	ppc; phosphoenolpyruvate carboxylase [EC:4.1.1.31]	Metabolism	Energy metabolism	Methane metabolism	331.701	330.561	349.719	356.86	<0.001	***
korA	Growth yield	C cycle	K00174	korA, oorA, oforA; 2-oxoglutarate/2-oxoacid ferredoxin oxidoreductase subunit alpha [EC:1.2.7.3 1.2.7.11]	Metabolism	Energy metabolism	Carbon fixation pathways in prokaryotes	358.548	360.851	452.871	443.649	<0.001	***
korB	Growth yield	C cycle	K00175	korB, oorB, oforB; 2-oxoglutarate/2-oxoacid ferredoxin oxidoreductase subunit beta [EC:1.2.7.3 1.2.7.11]	Metabolism	Energy metabolism	Carbon fixation pathways in prokaryotes	237.484	237.793	295.989	288.057	<0.001	***
korD	Growth yield	C cycle	K00176	korD, oorD; 2-oxoglutarate ferredoxin oxidoreductase subunit delta [EC:1.2.7.3]	Metabolism	Energy metabolism	Carbon fixation pathways in prokaryotes	4.92465	5.06682	5.84528	6.52665	0.011	*
AACS	Growth yield	C cycle	K01907	AACS, acsA; acetoacetyl-CoA synthetase [EC:6.2.1.16]	Metabolism	Amino acid metabolism	Valine, leucine and isoleucine degradation	7.5793	7.32582	4.05395	4.1371	<0.001	***
fdhA	Growth yield	C cycle	K05299	fdhA; formate dehydrogenase (NADP+) alpha subunit [EC:1.17.1.10]	Metabolism	Energy metabolism	Methane metabolism	6.23498	5.7737	4.6789	3.83033	0.008	**
fdhB	Growth yield	C cycle	K00125	fdhB; formate dehydrogenase (coenzyme F420) beta subunit [EC:1.17.98.3 1.8.98.6]	Metabolism	Energy metabolism	Methane metabolism	0.206625	0.179775	0.42685	0.578725	0.001	**
pccA	Growth yield	C cycle	K01965	PCCA, pccA; propionyl-CoA carboxylase alpha chain [EC:6.4.1.3]	Metabolism	Amino acid metabolism	Valine, leucine and isoleucine degradation	298.454	291.02	260.871	254.284	<0.001	***
pccB	Growth yield	C cycle	K01966	PCCB, pccB; propionyl-CoA carboxylase beta chain [EC:6.4.1.3 2.1.3.15]	Metabolism	Amino acid metabolism	Valine, leucine and isoleucine degradation	413.237	414.666	434.429	422.517	0.043	*
accA	Growth yield	C cycle	K01962	accA; acetyl-CoA carboxylase carboxyl transferase subunit alpha [EC:6.4.1.2 2.1.3.15]	Metabolism	Lipid metabolism	Fatty acid biosynthesis	277.812	269.362	276.525	265.133	0.427
accB	Growth yield	C cycle	K02160	accB, bccP; acetyl-CoA carboxylase biotin carboxyl carrier protein	Metabolism	Lipid metabolism	Fatty acid biosynthesis	154.305	154.176	128.614	131.315	<0.001	***
accC	Growth yield	C cycle	K01961	accC; acetyl-CoA carboxylase, biotin carboxylase subunit [EC:6.4.1.2 6.3.4.14]	Metabolism	Lipid metabolism	Fatty acid biosynthesis	477.198	474.75	490.186	480.415	0.164
accD	Growth yield	C cycle	K01963	accD; acetyl-CoA carboxylase carboxyl transferase subunit beta [EC:6.4.1.2 2.1.3.15]	Metabolism	Lipid metabolism	Fatty acid biosynthesis	13.523	12.4706	14.7831	13.5071	0.222
AMY	Growth yield	C cycle	K01176	AMY, amyA, malS; alpha-amylase [EC:3.2.1.1]	Organismal Systems	Digestive system	Carbohydrate digestion and absorption	347.613	346.811	306.235	320.222	<0.001	***
IMA	Growth yield	C cycle	K01182	IMA, malL; oligo-1,6-glucosidase [EC:3.2.1.10]	Metabolism	Carbohydrate metabolism	Starch and sucrose metabolism	302.36	310.721	237.382	232.914	<0.001	***
malE	Growth yield	C cycle	K10108	malE; maltose/maltodextrin transport system substrate-binding protein	Cellular Processes	Cell motility	Bacterial chemotaxis	25.0647	26.9338	18.1881	19.1778	<0.001	***
malF	Growth yield	C cycle	K10109	malF; maltose/maltodextrin transport system permease protein	Environmental Information Processing	Membrane transport	ABC transporters	13.4306	15.0525	14.3757	14.562	0.815
malK	Growth yield	C cycle	K10111	malK, mtlK, thuK; multiple sugar transport system ATP-binding protein [EC:7.5.2.-]	Environmental Information Processing	Membrane transport	ABC transporters	25.0576	24.0908	15.2216	16.401	<0.001	***
malQ	Growth yield	C cycle	K00705	malQ; 4-alpha-glucanotransferase [EC:2.4.1.25]	Metabolism	Carbohydrate metabolism	Starch and sucrose metabolism	322.911	324.267	397.391	403.857	<0.001	***
malZ	Growth yield	C cycle	K01187	malZ; alpha-glucosidase [EC:3.2.1.20]	Metabolism	Carbohydrate metabolism	Starch and sucrose metabolism	567.194	557.233	596.854	591.122	0.001	**
pulA	Growth yield	C cycle	K01200	pulA; pullulanase [EC:3.2.1.41]	Metabolism	Carbohydrate metabolism	Starch and sucrose metabolism	64.8674	71.0609	61.023	59.2167	0.002	**
abfA	Growth yield	C cycle	K01209	abfA; alpha-L-arabinofuranosidase [EC:3.2.1.55]	Metabolism	Carbohydrate metabolism	Amino sugar and nucleotide sugar metabolism	130.197	129.766	192.687	188.547	<0.001	***
manB	Growth yield	C cycle	K01840	manB; phosphomannomutase [EC:5.4.2.8]	Metabolism	Glycan biosynthesis and metabolism	O-Antigen nucleotide sugar biosynthesis	248.991	252.863	321.307	326.889	<0.001	***
pmm-pgm	Growth yield	C cycle	K15778	pmm-pgm; phosphomannomutase / phosphoglucomutase [EC:5.4.2.8 5.4.2.2]	Metabolism	Biosynthesis of other secondary metabolites	Streptomycin biosynthesis	4.60085	5.09102	6.5453	7.10435	0.001	**
xylA	Growth yield	C cycle	K01805	xylA; xylose isomerase [EC:5.3.1.5]	Metabolism	Carbohydrate metabolism	Fructose and mannose metabolism	113.229	112.374	146.674	138.865	<0.001	***
xylB	Growth yield	C cycle	K00854	xylB, XYLB; xylulokinase [EC:2.7.1.17]	Metabolism	Carbohydrate metabolism	Pentose and glucuronate interconversions	144.202	141.95	159.249	160.908	<0.001	***
xylF	Growth yield	C cycle	K10543	xylF; D-xylose transport system substrate-binding protein	Environmental Information Processing	Membrane transport	ABC transporters	28.385	30.3644	26.3983	28.4414	0.361
xylG	Growth yield	C cycle	K10545	xylG; D-xylose transport system ATP-binding protein [EC:7.5.2.10]	Environmental Information Processing	Membrane transport	ABC transporters	1.54458	1.19625	1.97372	1.90075	0.069
xylH	Growth yield	C cycle	K10544	xylH; D-xylose transport system permease protein	Environmental Information Processing	Membrane transport	ABC transporters	20.47	21.4864	28.3772	27.4238	<0.001	***
xynB	Growth yield	C cycle	K01198	xynB; xylan 1,4-beta-xylosidase [EC:3.2.1.37]	Metabolism	Carbohydrate metabolism	Amino sugar and nucleotide sugar metabolism	179.57	184.978	191.05	183.964	0.105
xynD	Growth yield	C cycle	K15921	xynD; arabinoxylan arabinofuranohydrolase [EC:3.2.1.55]	Metabolism	Carbohydrate metabolism	Amino sugar and nucleotide sugar metabolism	1.37577	1.20808	1.1667	1.06895	0.35
cbh	Growth yield	C cycle	K01442	cbh; choloylglycine hydrolase [EC:3.5.1.24]	Metabolism	Lipid metabolism	Secondary bile acid biosynthesis	3.98785	3.83867	6.67025	7.2239	<0.001	***
pel	Growth yield	C cycle	K01728	pel; pectate lyase [EC:4.2.2.2]	Cellular Processes	Cellular community - prokaryotes	Quorum sensing	29.0145	29.3679	31.6872	34.6249	0.018	*
nifA	Growth yield	N cycle	K02584	nifA; Nif-specific regulatory protein	Environmental Information Processing	Signal transduction	Two-component system	203.982	207.939	266.155	261.221	<0.001	***
nifD	Growth yield	N cycle	K02586	nifD; nitrogenase molybdenum-iron protein alpha chain [EC:1.18.6.1]	Metabolism	Xenobiotics biodegradation and metabolism	Chloroalkane and chloroalkene degradation	10.2001	9.1831	1.97537	1.7338	<0.001	***
nifH	Growth yield	N cycle	K02588	nifH; nitrogenase iron protein NifH	Metabolism	Xenobiotics biodegradation and metabolism	Chloroalkane and chloroalkene degradation	2.31937	1.73415	2.44997	2.45193	0.221
nifK	Growth yield	N cycle	K02591	nifK; nitrogenase molybdenum-iron protein beta chain [EC:1.18.6.1]	Metabolism	Xenobiotics biodegradation and metabolism	Chloroalkane and chloroalkene degradation	0.600875	0.5398	1.06418	0.8711	0.02	*
hao	Growth yield	N cycle	K10535	hao; hydroxylamine dehydrogenase [EC:1.7.2.6]	Metabolism	Energy metabolism	Nitrogen metabolism	4.95772	4.53383	5.21045	4.03605	0.785
narG	Growth yield	N cycle	K00370	narG, narZ, nxrA; nitrate reductase / nitrite oxidoreductase, alpha subunit [EC:1.7.5.1 1.7.99.-]	Environmental Information Processing	Signal transduction	Two-component system	162.413	166.788	149.43	145.657	0.005	**
narH	Growth yield	N cycle	K00371	narH, narY, nxrB; nitrate reductase / nitrite oxidoreductase, beta subunit [EC:1.7.5.1 1.7.99.-]	Environmental Information Processing	Signal transduction	Two-component system	78.5292	83.8117	86.6217	80.5151	0.41
nirK	Growth yield	N cycle	K00368	nirK; nitrite reductase (NO-forming) [EC:1.7.2.1]	Metabolism	Energy metabolism	Nitrogen metabolism	271.85	276.866	214.302	221.833	<0.001	***
nirS	Growth yield	N cycle	K15864	nirS; nitrite reductase (NO-forming) / hydroxylamine reductase [EC:1.7.2.1 1.7.99.1]	Metabolism	Energy metabolism	Nitrogen metabolism	24.5096	24.8926	15.7083	17.9675	<0.001	***
norB	Growth yield	N cycle	K04561	norB; nitric oxide reductase subunit B [EC:1.7.2.5]	Metabolism	Energy metabolism	Nitrogen metabolism	218.848	216.134	147.866	148.753	<0.001	***
norC	Growth yield	N cycle	K02305	norC; nitric oxide reductase subunit C	Metabolism	Energy metabolism	Nitrogen metabolism	28.0878	30.3214	18.7381	18.5323	<0.001	***
nasA	Growth yield	N cycle	K00372	nasA; assimilatory nitrate reductase catalytic subunit [EC:1.7.99.-]	Metabolism	Energy metabolism	Nitrogen metabolism	5.78122	5.01565	9.82835	9.44445	<0.001	***
nasB	Growth yield	N cycle	K00360	nasB; assimilatory nitrate reductase electron transfer subunit [EC:1.7.99.-]	Metabolism	Energy metabolism	Nitrogen metabolism	63.7441	65.2863	81.2461	76.8573	<0.001	***
nirA	Growth yield	N cycle	K00366	nirA; ferredoxin-nitrite reductase [EC:1.7.7.1]	Metabolism	Energy metabolism	Nitrogen metabolism	234.84	241.094	221.123	224.916	0.005	**
nirB	Growth yield	N cycle	K00362	nirB; nitrite reductase (NADH) large subunit [EC:1.7.1.15]	Metabolism	Energy metabolism	Nitrogen metabolism	96.185	100.089	72.3631	76.0382	<0.001	***
nirD	Growth yield	N cycle	K00363	nirD; nitrite reductase (NADH) small subunit [EC:1.7.1.15]	Metabolism	Energy metabolism	Nitrogen metabolism	86.2068	87.8038	78.0489	84.8053	0.057
narI	Growth yield	N cycle	K00374	narI, narV; nitrate reductase gamma subunit [EC:1.7.5.1 1.7.99.-]	Environmental Information Processing	Signal transduction	Two-component system	2.63505	2.18447	2.19918	2.53547	0.878
narJ	Growth yield	N cycle	K00373	narJ, narW; nitrate reductase molybdenum cofactor assembly chaperone NarJ/NarW	Environmental Information Processing	Signal transduction	Two-component system	24.9966	26.0012	22.2327	20.1701	0.002	**
napA	Growth yield	N cycle	K02567	napA; nitrate reductase (cytochrome) [EC:1.9.6.1]	Metabolism	Energy metabolism	Nitrogen metabolism	0.05065	0.157925	0	0	0.05
napB	Growth yield	N cycle	K02568	napB; nitrate reductase (cytochrome), electron transfer subunit	Metabolism	Energy metabolism	Nitrogen metabolism	12.9436	11.6368	19.8183	20.663	<0.001	***
nrfA	Growth yield	N cycle	K03385	nrfA; nitrite reductase (cytochrome c-552) [EC:1.7.2.2]	Metabolism	Energy metabolism	Nitrogen metabolism	84.2711	81.9057	156.692	160.311	<0.001	***
asnA	Growth yield	N cycle	K01914	asnA; aspartate--ammonia ligase [EC:6.3.1.1]	Metabolism	Metabolism of other amino acids	Cyanoamino acid metabolism	10.7448	11.8351	7.23015	8.5011	<0.001	***
asnB	Growth yield	N cycle	K01953	asnB, ASNS; asparagine synthase (glutamine-hydrolysing) [EC:6.3.5.4]	Metabolism	Amino acid metabolism	Alanine, aspartate and glutamate metabolism	938.554	940.413	1140.58	1136.58	<0.001	***
aspA	Growth yield	N cycle	K01744	aspA; aspartate ammonia-lyase [EC:4.3.1.1]	Metabolism	Amino acid metabolism	Alanine, aspartate and glutamate metabolism	71.6875	72.9975	127.049	132.823	<0.001	***
arcC	Growth yield	N cycle	K00926	arcC; carbamate kinase [EC:2.7.2.2]	Metabolism	Amino acid metabolism	Arginine biosynthesis	66.425	67.8817	88.3536	88.8658	<0.001	***
glsA	Growth yield	N cycle	K01425	glsA, GLS; glutaminase [EC:3.5.1.2]	Human Diseases	Cancer: overview	Central carbon metabolism in cancer	65.5368	68.8594	35.6086	37.9515	<0.001	***
GLT1	Growth yield	N cycle	K00264	GLT1; glutamate synthase (NADH) [EC:1.4.1.14]	Metabolism	Amino acid metabolism	Alanine, aspartate and glutamate metabolism	2.57665	3.20153	4.76395	4.2491	0.001	**
hutH	Growth yield	N cycle	K01745	hutH, HAL; histidine ammonia-lyase [EC:4.3.1.3]	Metabolism	Amino acid metabolism	Histidine metabolism	357.153	358.579	311.819	306.269	<0.001	***
ncd2	Growth yield	N cycle	K00459	ncd2, npd; nitronate monooxygenase [EC:1.13.12.16]	Metabolism	Energy metabolism	Nitrogen metabolism	294.559	278.982	315.24	315.791	<0.001	***
tdcB	Growth yield	N cycle	K01754	E4.3.1.19, ilvA, tdcB; threonine dehydratase [EC:4.3.1.19]	Metabolism	Amino acid metabolism	Valine, leucine and isoleucine biosynthesis	586.774	596.16	647.326	651.509	<0.001	***
tnaA	Growth yield	N cycle	K01667	tnaA; tryptophanase [EC:4.1.99.1]	Metabolism	Amino acid metabolism	Tryptophan metabolism	60.216	59.5706	74.9381	70.1508	<0.001	***
ureA	Growth yield	N cycle	K01430	ureA; urease subunit gamma [EC:3.5.1.5]	Metabolism	Xenobiotics biodegradation and metabolism	Atrazine degradation	20.8788	19.7099	15.758	13.2639	<0.001	***
ureB	Growth yield	N cycle	K01429	ureB; urease subunit beta [EC:3.5.1.5]	Metabolism	Xenobiotics biodegradation and metabolism	Atrazine degradation	17.9538	17.333	8.18717	6.77118	<0.001	***
ureC	Growth yield	N cycle	K01428	ureC; urease subunit alpha [EC:3.5.1.5]	Human Diseases	Infectious disease: bacterial	Epithelial cell signaling in Helicobacter pylori infection	64.2976	63.4881	55.8341	54.364	0.002	**
ureI	Growth yield	N cycle	K03191	ureI; acid-activated urea channel	Human Diseases	Infectious disease: bacterial	Epithelial cell signaling in Helicobacter pylori infection	1.3971	0.850425	0.87755	1.02382	0.493
phoN	Growth yield	P cycle	K09474	phoN; acid phosphatase (class A) [EC:3.1.3.2]	Environmental Information Processing	Signal transduction	Two-component system	1.8968	1.35287	3.38925	3.0835	0.002	**
phoA	Growth yield	P cycle	K01077	E3.1.3.1, phoA, phoB; alkaline phosphatase [EC:3.1.3.1]	Environmental Information Processing	Signal transduction	Two-component system	491.437	485.877	509.658	509	0.001	**
phoD	Growth yield	P cycle	K01113	phoD; alkaline phosphatase D [EC:3.1.3.1]	Environmental Information Processing	Signal transduction	Two-component system	357.482	357.831	329.238	326.313	<0.001	***
phoB	Growth yield	P cycle	K07657	phoB; two-component system, OmpR family, phosphate regulon response regulator PhoB	Environmental Information Processing	Signal transduction	Two-component system	84.3812	89.9421	91.8037	96.1357	0.031	*
phoR	Growth yield	P cycle	K07636	phoR; two-component system, OmpR family, phosphate regulon sensor histidine kinase PhoR [EC:2.7.13.3]	Environmental Information Processing	Signal transduction	Two-component system	371.264	372.23	394.206	391.204	<0.001	***
phoB1, phoP	Growth yield	P cycle	K07658	phoB1, phoP; two-component system, OmpR family, alkaline phosphatase synthesis response regulator PhoP	Environmental Information Processing	Signal transduction	Two-component system	80.2947	78.1671	87.397	83.9962	0.005	**
phoP	Growth yield	P cycle	K07660	phoP; two-component system, OmpR family, response regulator PhoP	Human Diseases	Drug resistance: antimicrobial	Cationic antimicrobial peptide (CAMP) resistance	2.76593	2.5901	1.1306	1.6052	0.003	**
glpQ, ugpQ	Growth yield	P cycle	K01126	E3.1.4.46, glpQ, ugpQ; glycerophosphoryl diester phosphodiesterase [EC:3.1.4.46]	Metabolism	Lipid metabolism	Glycerophospholipid metabolism	360.625	367.869	298.74	304.244	<0.001	***
glpA	Growth yield	P cycle	K00111	glpA, glpD; glycerol-3-phosphate dehydrogenase [EC:1.1.5.3]	Metabolism	Lipid metabolism	Glycerophospholipid metabolism	223.051	220.342	230.004	222.751	0.223
glpB	Growth yield	P cycle	K00112	glpB; glycerol-3-phosphate dehydrogenase subunit B [EC:1.1.5.3]	Metabolism	Lipid metabolism	Glycerophospholipid metabolism	10.0957	10.7074	9.2854	10.5168	0.47
glpC	Growth yield	P cycle	K00113	glpC; glycerol-3-phosphate dehydrogenase subunit C	Metabolism	Lipid metabolism	Glycerophospholipid metabolism	55.5248	53.6044	58.4715	57.8717	0.064
appA	Growth yield	P cycle	K01093	appA; 4-phytase / acid phosphatase [EC:3.1.3.26 3.1.3.2]	Metabolism	Metabolism of cofactors and vitamins	Riboflavin metabolism	6.62495	6.08155	7.78568	7.7362	0.024	*
phnA	Growth yield	P cycle	K19670	phnA; phosphonoacetate hydrolase [EC:3.11.1.2]	Metabolism	Metabolism of other amino acids	Phosphonate and phosphinate metabolism	25.1355	25.0857	28.0227	25.1137	0.164
phnG	Growth yield	P cycle	K06166	phnG; alpha-D-ribose 1-methylphosphonate 5-triphosphate synthase subunit PhnG [EC:2.7.8.37]	Metabolism	Metabolism of other amino acids	Phosphonate and phosphinate metabolism	6.8502	7.9524	1.31458	1.86637	<0.001	***
phnH	Growth yield	P cycle	K06165	phnH; alpha-D-ribose 1-methylphosphonate 5-triphosphate synthase subunit PhnH [EC:2.7.8.37]	Metabolism	Metabolism of other amino acids	Phosphonate and phosphinate metabolism	7.56755	7.3202	2.62445	2.382	<0.001	***
phnI	Growth yield	P cycle	K06164	phnI; alpha-D-ribose 1-methylphosphonate 5-triphosphate synthase subunit PhnI [EC:2.7.8.37]	Metabolism	Metabolism of other amino acids	Phosphonate and phosphinate metabolism	14.9466	14.2254	4.47345	4.54973	<0.001	***
phnJ	Growth yield	P cycle	K06163	phnJ; alpha-D-ribose 1-methylphosphonate 5-phosphate C-P lyase [EC:4.7.1.1]	Metabolism	Metabolism of other amino acids	Phosphonate and phosphinate metabolism	13.8582	13.1693	3.44352	3.60077	<0.001	***
phnL	Growth yield	P cycle	K05780	phnL; alpha-D-ribose 1-methylphosphonate 5-triphosphate synthase subunit PhnL [EC:2.7.8.37]	Metabolism	Metabolism of other amino acids	Phosphonate and phosphinate metabolism	8.96837	8.70225	2.45078	2.08108	<0.001	***
phnM	Growth yield	P cycle	K06162	phnM; alpha-D-ribose 1-methylphosphonate 5-triphosphate diphosphatase [EC:3.6.1.63]	Metabolism	Metabolism of other amino acids	Phosphonate and phosphinate metabolism	26.2165	25.485	5.86525	5.48085	<0.001	***
phnN	Growth yield	P cycle	K05774	phnN; ribose 1,5-bisphosphokinase [EC:2.7.4.23]	Metabolism	Carbohydrate metabolism	Pentose phosphate pathway	6.3375	6.15793	1.02737	1.59108	<0.001	***
phnO	Growth yield	P cycle	K09994	phnO; (aminoalkyl)phosphonate N-acetyltransferase [EC:2.3.1.280]	Metabolism	Metabolism of other amino acids	Phosphonate and phosphinate metabolism	0.87505	1.1307	3.77345	3.52208	<0.001	***
phnP	Growth yield	P cycle	K06167	phnP; phosphoribosyl 1,2-cyclic phosphate phosphodiesterase [EC:3.1.4.55]	Metabolism	Metabolism of other amino acids	Phosphonate and phosphinate metabolism	110.725	107.868	128.691	126.049	<0.001	***
phnW	Growth yield	P cycle	K03430	phnW; 2-aminoethylphosphonate-pyruvate transaminase [EC:2.6.1.37]	Metabolism	Metabolism of other amino acids	Phosphonate and phosphinate metabolism	11.0611	12.6149	6.75667	6.1673	<0.001	***
phnX	Growth yield	P cycle	K05306	phnX; phosphonoacetaldehyde hydrolase [EC:3.11.1.1]	Metabolism	Metabolism of other amino acids	Phosphonate and phosphinate metabolism	1.5736	1.5126	1.80278	1.9223	0.261
ppa	Growth yield	P cycle	K01507	ppa; inorganic pyrophosphatase [EC:3.6.1.1]	Metabolism	Energy metabolism	Oxidative phosphorylation	225.565	224.651	216.603	215.709	0.002	**
ppk1	Growth yield	P cycle	K00937	ppk1; polyphosphate kinase [EC:2.7.4.1]	Genetic Information Processing	Folding, sorting and degradation	RNA degradation	471.496	487.262	535.949	537.077	<0.001	***
ppx-gppA	Growth yield	P cycle	K01524	ppx-gppA; exopolyphosphatase / guanosine-5'-triphosphate,3'-diphosphate pyrophosphatase [EC:3.6.1.11 3.6.1.40]	Metabolism	Nucleotide metabolism	Purine metabolism	381.28	380.337	343.581	341.83	<0.001	***
phnC	Growth yield	P cycle	K02041	phnC; phosphonate transport system ATP-binding protein [EC:7.3.2.2]	Environmental Information Processing	Membrane transport	ABC transporters	36.0353	39.3419	20.6795	20.3793	<0.001	***
phnD	Growth yield	P cycle	K02044	phnD; phosphonate transport system substrate-binding protein	Environmental Information Processing	Membrane transport	ABC transporters	105.337	114.318	64.132	67.2767	<0.001	***
phnE	Growth yield	P cycle	K02042	phnE; phosphonate transport system permease protein	Environmental Information Processing	Membrane transport	ABC transporters	57.5916	57.54	30.7383	30.9648	<0.001	***
ugpA	Growth yield	P cycle	K05814	ugpA; sn-glycerol 3-phosphate transport system permease protein	Environmental Information Processing	Membrane transport	ABC transporters	21.6594	20.3182	17.8297	17.4494	<0.001	***
ugpB	Growth yield	P cycle	K05813	ugpB; sn-glycerol 3-phosphate transport system substrate-binding protein	Environmental Information Processing	Membrane transport	ABC transporters	46.5708	50.0871	64.5827	60.7269	<0.001	***
ugpC	Growth yield	P cycle	K05816	ugpC; sn-glycerol 3-phosphate transport system ATP-binding protein [EC:7.6.2.10]	Environmental Information Processing	Membrane transport	ABC transporters	9.8968	10.713	19.2504	17.821	<0.001	***
ugpE	Growth yield	P cycle	K05815	ugpE; sn-glycerol 3-phosphate transport system permease protein	Environmental Information Processing	Membrane transport	ABC transporters	22.8127	23.6961	28.2042	25.402	0.006	**
glpT	Growth yield	P cycle	K17325	K17325, glpT; glycerol transport system ATP-binding protein	Environmental Information Processing	Membrane transport	ABC transporters	10.4127	9.90622	4.29195	3.17772	<0.001	***
gcd	Growth yield	P cycle	K00117	gcd; quinoprotein glucose dehydrogenase [EC:1.1.5.2]	Metabolism	Carbohydrate metabolism	Pentose phosphate pathway	669.257	663.61	868.326	853.992	<0.001	***
pstB	Growth yield	P cycle	K02036	pstB; phosphate transport system ATP-binding protein [EC:7.3.2.1]	Environmental Information Processing	Membrane transport	ABC transporters	284.259	276.105	293.709	292.435	0.01	*
pstC	Growth yield	P cycle	K02037	pstC; phosphate transport system permease protein	Environmental Information Processing	Membrane transport	ABC transporters	531.806	531.282	485.676	497.72	<0.001	***
pstA	Growth yield	P cycle	K02038	pstA; phosphate transport system permease protein	Environmental Information Processing	Membrane transport	ABC transporters	3.4832	3.03303	3.01515	2.37845	0.243
pstS	Growth yield	P cycle	K02040	pstS; phosphate transport system substrate-binding protein	Human Diseases	Infectious disease: bacterial	Tuberculosis	324.357	328.469	313.845	308.265	<0.001	***
GroEL	Stress tolerance	Moleculuar chaperons	K04077	groEL, HSPD1; chaperonin GroEL	Human Diseases	Endocrine and metabolic disease	Type I diabetes mellitus	868.112	887.489	964.851	960.215	<0.001	***
DnaK	Stress tolerance	Moleculuar chaperons	K04043	dnaK, HSPA9; molecular chaperone DnaK	Human Diseases	Infectious disease: bacterial	Tuberculosis	801.568	793.742	857.033	835.856	<0.001	***
ectA	Stress tolerance	Osmolyte production	K06718	ectA; L-2,4-diaminobutyric acid acetyltransferase [EC:2.3.1.178]	Metabolism	Amino acid metabolism	Glycine, serine and threonine metabolism	24.9911	27.746	4.11148	4.15358	<0.001	***
ectB	Stress tolerance	Osmolyte production	K00836	ectB, dat; diaminobutyrate-2-oxoglutarate transaminase [EC:2.6.1.76]	Metabolism	Amino acid metabolism	Glycine, serine and threonine metabolism	13.7624	13.9082	10.8093	9.13337	<0.001	***
ectC	Stress tolerance	Osmolyte production	K06720	ectC; L-ectoine synthase [EC:4.2.1.108]	Metabolism	Amino acid metabolism	Glycine, serine and threonine metabolism	25.9871	28.6906	7.48308	8.89592	<0.001	***
ectD	Stress tolerance	Osmolyte production	K10674	ectD; ectoine hydroxylase [EC:1.14.11.55]	Metabolism	Amino acid metabolism	Glycine, serine and threonine metabolism	60.425	62.8532	40.5175	43.0026	<0.001	***
gbsA	Stress tolerance	Osmolyte production	K00130	betB, gbsA; betaine-aldehyde dehydrogenase [EC:1.2.1.8]	Metabolism	Amino acid metabolism	Glycine, serine and threonine metabolism	88.5408	93.2621	71.6389	71.0843	<0.001	***
gbsB	Stress tolerance	Osmolyte production	K11440	gbsB; choline dehydrogenase [EC:1.1.1.1]	Metabolism	Amino acid metabolism	Glycine, serine and threonine metabolism	0.0631	0.022575	0.16135	0.3167	0.029	*
opuA	Stress tolerance	Osmolyte production	K05847	opuA; osmoprotectant transport system ATP-binding protein [EC:7.6.2.9]	Environmental Information Processing	Membrane transport	ABC transporters	109.829	109.887	101.223	97.6998	0.001	**
opuBD	Stress tolerance	Osmolyte production	K05846	opuBD; osmoprotectant transport system permease protein	Environmental Information Processing	Membrane transport	ABC transporters	56.6415	59.3332	52.7092	47.5894	0.004	**
opuC	Stress tolerance	Osmolyte production	K05845	opuC; osmoprotectant transport system substrate-binding protein	Environmental Information Processing	Membrane transport	ABC transporters	97.939	107.24	95.647	92.8829	0.06
otsA	Stress tolerance	Osmolyte production	K00697	otsA; trehalose 6-phosphate synthase [EC:2.4.1.15 2.4.1.347]	Metabolism	Carbohydrate metabolism	Starch and sucrose metabolism	430.406	434.265	434.894	432.013	0.792
otsB	Stress tolerance	Osmolyte production	K01087	otsB; trehalose 6-phosphate phosphatase [EC:3.1.3.12]	Metabolism	Carbohydrate metabolism	Starch and sucrose metabolism	149.74	150.283	103.807	107.627	<0.001	***
treS	Stress tolerance	Osmolyte production	K05343	treS; maltose alpha-D-glucosyltransferase / alpha-amylase [EC:5.4.99.16 3.2.1.1]	Metabolism	Carbohydrate metabolism	Starch and sucrose metabolism	301.192	301.503	289.234	290.16	0.007	**
gdh	Stress tolerance	Osmolyte production	K00034	gdh; glucose 1-dehydrogenase [EC:1.1.1.47]	Metabolism	Carbohydrate metabolism	Pentose phosphate pathway	520.778	515.714	448.047	445.732	<0.001	***
gltB	Stress tolerance	Osmolyte production	K00265	gltB; glutamate synthase (NADPH) large chain [EC:1.4.1.13]	Metabolism	Amino acid metabolism	Alanine, aspartate and glutamate metabolism	580.34	606.052	625.362	610.874	0.091
gltD	Stress tolerance	Osmolyte production	K00266	gltD; glutamate synthase (NADPH) small chain [EC:1.4.1.13]	Metabolism	Amino acid metabolism	Alanine, aspartate and glutamate metabolism	521.458	532.713	594.075	586.806	<0.001	***
GDH2	Stress tolerance	Osmolyte production	K15371	GDH2; glutamate dehydrogenase [EC:1.4.1.2]	Metabolism	Metabolism of other amino acids	Taurine and hypotaurine metabolism	522.611	544.71	410.416	399.268	<0.001	***
gdhA	Stress tolerance	Osmolyte production	K00261/K00262	GLUD1_2, gdhA; glutamate dehydrogenase (NAD(P)+) [EC:1.4.1.3]	Organismal Systems	Excretory system	Proximal tubule bicarbonate reclamation	378.406	377.64	381.3	382.672	0.157
gudB	Stress tolerance	Osmolyte production	K00260	gudB, rocG; glutamate dehydrogenase [EC:1.4.1.2]	Metabolism	Metabolism of other amino acids	Taurine and hypotaurine metabolism	39.41	41.2814	49.1287	49.7893	<0.001	***
glnA	Stress tolerance	Osmolyte production	K01915	glnA, GLUL; glutamine synthetase [EC:6.3.1.2]	Organismal Systems	Nervous system	GABAergic synapse	836.246	859.036	948.741	968.929	<0.001	***
proA	Stress tolerance	Osmolyte production	K00147	proA; glutamate-5-semialdehyde dehydrogenase [EC:1.2.1.41]	Metabolism	Biosynthesis of other secondary metabolites	Carbapenem biosynthesis	146.482	148.322	106.801	103.325	<0.001	***
proB	Stress tolerance	Osmolyte production	K00931	proB; glutamate 5-kinase [EC:2.7.2.11]	Metabolism	Biosynthesis of other secondary metabolites	Carbapenem biosynthesis	133.444	137.624	91.6493	87.6034	<0.001	***
proC	Stress tolerance	Osmolyte production	K00286	proC; pyrroline-5-carboxylate reductase [EC:1.5.1.2]	Metabolism	Amino acid metabolism	Arginine and proline metabolism	203.375	201.471	137.185	133.985	<0.001	***
kdpA	Stress tolerance	Compatible solutes transport	K01546	kdpA; potassium-transporting ATPase potassium-binding subunit	Environmental Information Processing	Signal transduction	Two-component system	13.8424	14.3753	11.4252	11.8595	0.001	**
kdpB	Stress tolerance	Compatible solutes transport	K01547	kdpB; potassium-transporting ATPase ATP-binding subunit [EC:7.2.2.6]	Environmental Information Processing	Signal transduction	Two-component system	16.1566	17.4673	14.1886	16.1487	0.255
kdpC	Stress tolerance	Compatible solutes transport	K01548	kdpC; potassium-transporting ATPase KdpC subunit	Environmental Information Processing	Signal transduction	Two-component system	6.1304	5.023	3.75845	2.92437	0.001	**
exoP	Stress tolerance	Polysaccharide biosynthesis transport	K16554	exoP, vpsO; polysaccharide biosynthesis transport protein	Cellular Processes	Cellular community - prokaryotes	Biofilm formation - Vibrio cholerae	45.3586	44.9588	23.1376	21.7376	<0.001	***
mcp	Resource acqisition	Cell motility	K03406	mcp; methyl-accepting chemotaxis protein	Cellular Processes	Cell motility	Bacterial chemotaxis	502.012	509.255	575.361	581.716	<0.001	***
cheBR	Resource acqisition	Cell motility	K13924	cheBR; two-component system, chemotaxis family, CheB/CheR fusion protein [EC:2.1.1.80 3.1.1.61]	Cellular Processes	Cell motility	Bacterial chemotaxis	852.226	849.046	832.969	851.65	0.358
entB, dhbB, vibB, mxcF	Resource acqisition	Siderophore synthesis	K01252	entB, dhbB, vibB, mxcF; bifunctional isochorismate lyase / aryl carrier protein [EC:3.3.2.1 6.3.2.14]	Metabolism	Metabolism of terpenoids and polyketides	Biosynthesis of siderophore group nonribosomal peptides	3.11752	3.1798	0.07435	0.21295	<0.001	***
entD	Resource acqisition	Siderophore synthesis	K02362	entD; enterobactin synthetase component D [EC:6.3.2.14 2.7.8.-]	Metabolism	Metabolism of terpenoids and polyketides	Biosynthesis of siderophore group nonribosomal peptides	9.98062	9.82132	4.68928	5.47928	<0.001	***
entE, dhbE, vibE, mxcE	Resource acqisition	Siderophore synthesis	K02363	entE, dhbE, vibE, mxcE; 2,3-dihydroxybenzoate---[aryl-carrier protein] ligase [EC:6.3.2.14 6.2.1.71]	Metabolism	Metabolism of terpenoids and polyketides	Biosynthesis of siderophore group nonribosomal peptides	5.16055	5.64297	15.1032	14.6391	<0.001	***
entF	Resource acqisition	Siderophore synthesis	K02364	entF; L-serine---[L-seryl-carrier protein] ligase [EC:6.3.2.14 6.2.1.72]	Metabolism	Metabolism of terpenoids and polyketides	Biosynthesis of siderophore group nonribosomal peptides	99.4438	97.3814	102.475	106.119	0.141
menF	Resource acqisition	Siderophore synthesis	K02552	menF; menaquinone-specific isochorismate synthase [EC:5.4.4.2]	Metabolism	Metabolism of terpenoids and polyketides	Biosynthesis of siderophore group nonribosomal peptides	3.21382	3.29767	2.03035	3.45725	0.367
pchB	Resource acqisition	Siderophore synthesis	K04782	pchB; isochorismate pyruvate lyase [EC:4.2.99.21]	Metabolism	Metabolism of terpenoids and polyketides	Biosynthesis of siderophore group nonribosomal peptides	51.8842	48.5832	47.3424	46.0197	0.077
pchE	Resource acqisition	Siderophore synthesis	K12239	pchE; L-cysteine---[L-cysteinyl-carrier protein] ligase PchE [EC:6.2.1.69]	Metabolism	Metabolism of terpenoids and polyketides	Biosynthesis of siderophore group nonribosomal peptides	4.76537	5.18217	5.1184	4.58478	0.8
flgA	Resource acqisition	Flagellar assembly	K02386	flgA; flagellar basal body P-ring formation protein FlgA	Cellular Processes	Cell motility	Flagellar assembly	26.29	27.0269	11.7835	12.2266	<0.001	***
flgB	Resource acqisition	Flagellar assembly	K02387	flgB; flagellar basal-body rod protein FlgB	Cellular Processes	Cell motility	Flagellar assembly	30.7147	30.3203	14.1175	16.6537	<0.001	***
flgC	Resource acqisition	Flagellar assembly	K02388	flgC; flagellar basal-body rod protein FlgC	Cellular Processes	Cell motility	Flagellar assembly	38.3292	45.7392	25.9568	26.7299	<0.001	***
flgD	Resource acqisition	Flagellar assembly	K02389	flgD; flagellar basal-body rod modification protein FlgD	Cellular Processes	Cell motility	Flagellar assembly	58.9991	63.9742	48.729	46.2646	<0.001	***
flgE	Resource acqisition	Flagellar assembly	K02390	flgE; flagellar hook protein FlgE	Cellular Processes	Cell motility	Flagellar assembly	47.965	52.8154	22.9748	24.8828	<0.001	***
flgF	Resource acqisition	Flagellar assembly	K02391	flgF; flagellar basal-body rod protein FlgF	Cellular Processes	Cell motility	Flagellar assembly	46.0116	48.252	25.4855	28.7897	<0.001	***
flgG	Resource acqisition	Flagellar assembly	K02392	flgG; flagellar basal-body rod protein FlgG	Cellular Processes	Cell motility	Flagellar assembly	51.3168	53.0359	36.743	35.5377	<0.001	***
flgH	Resource acqisition	Flagellar assembly	K02393	flgH; flagellar L-ring protein FlgH	Cellular Processes	Cell motility	Flagellar assembly	41.99	45.7609	25.2717	24.6209	<0.001	***
flgI	Resource acqisition	Flagellar assembly	K02394	flgI; flagellar P-ring protein FlgI	Cellular Processes	Cell motility	Flagellar assembly	58.8177	63.2738	36.8498	38.5374	<0.001	***
flgJ	Resource acqisition	Flagellar assembly	K02395	flgJ; peptidoglycan hydrolase FlgJ	Cellular Processes	Cell motility	Flagellar assembly	12.6841	11.1574	5.46082	5.7794	<0.001	***
flgK	Resource acqisition	Flagellar assembly	K02396	flgK; flagellar hook-associated protein 1	Cellular Processes	Cell motility	Flagellar assembly	68.4288	75.3029	45.9166	43.7841	<0.001	***
flgL	Resource acqisition	Flagellar assembly	K02397	flgL; flagellar hook-associated protein 3 FlgL	Cellular Processes	Cell motility	Flagellar assembly	51.6541	51.2937	31.5413	31.1921	<0.001	***
flgM	Resource acqisition	Flagellar assembly	K02398	flgM; negative regulator of flagellin synthesis FlgM	Cellular Processes	Cell motility	Flagellar assembly	8.0046	9.09815	1.375	2.15922	<0.001	***
flgN	Resource acqisition	Flagellar assembly	K02399	flgN; flagellar biosynthesis protein FlgN	Cellular Processes	Cell motility	Flagellar assembly	2.35995	3.3842	0.55665	1.25325	<0.001	***
flhA	Resource acqisition	Flagellar assembly	K02400	flhA; flagellar biosynthesis protein FlhA	Cellular Processes	Cell motility	Flagellar assembly	135.158	139.931	114.14	115.135	<0.001	***
flhB	Resource acqisition	Flagellar assembly	K02401	flhB; flagellar biosynthesis protein FlhB	Cellular Processes	Cell motility	Flagellar assembly	68.2838	69.6658	44.2927	43.7188	<0.001	***
flhC	Resource acqisition	Flagellar assembly	K02402	flhC; flagellar transcriptional activator FlhC	Cellular Processes	Cell motility	Flagellar assembly	0.9089	0.314425	2.00595	1.60487	<0.001	***
flhD	Resource acqisition	Flagellar assembly	K02403	flhD; flagellar transcriptional activator FlhD	Cellular Processes	Cell motility	Flagellar assembly	0.35705	0.206625	1.20095	1.28523	<0.001	***
fliA	Resource acqisition	Flagellar assembly	K02405	fliA, whiG; RNA polymerase sigma factor FliA	Cellular Processes	Cell motility	Flagellar assembly	144.783	150.36	150.997	149.183	0.52
fliD	Resource acqisition	Flagellar assembly	K02407	fliD; flagellar hook-associated protein 2	Cellular Processes	Cell motility	Flagellar assembly	48.3581	52.3239	41.7125	39.4764	<0.001	***
fliE	Resource acqisition	Flagellar assembly	K02408	fliE; flagellar hook-basal body complex protein FliE	Cellular Processes	Cell motility	Flagellar assembly	34.6112	33.1987	15.0797	18.6087	<0.001	***
fliF	Resource acqisition	Flagellar assembly	K02409	fliF; flagellar M-ring protein FliF	Cellular Processes	Cell motility	Flagellar assembly	77.4749	81.1245	44.4203	43.6818	<0.001	***
fliG	Resource acqisition	Flagellar assembly	K02410	fliG; flagellar motor switch protein FliG	Cellular Processes	Cell motility	Flagellar assembly	66.9087	69.4651	47.9815	45.3628	<0.001	***
fliH	Resource acqisition	Flagellar assembly	K02411	fliH; flagellar assembly protein FliH	Cellular Processes	Cell motility	Flagellar assembly	21.9036	26.0606	14.762	16.3612	<0.001	***
fliI	Resource acqisition	Flagellar assembly	K02412	fliI; flagellum-specific ATP synthase [EC:7.4.2.8]	Cellular Processes	Cell motility	Flagellar assembly	88.7056	91.0151	67.9409	68.1604	<0.001	***
fliJ	Resource acqisition	Flagellar assembly	K02413	fliJ; flagellar protein FliJ	Cellular Processes	Cell motility	Flagellar assembly	7.16282	8.78352	2.11715	2.22002	<0.001	***
fliK	Resource acqisition	Flagellar assembly	K02414	fliK; flagellar hook-length control protein FliK	Cellular Processes	Cell motility	Flagellar assembly	12.3238	13.6738	4.40917	4.87188	<0.001	***
fliL	Resource acqisition	Flagellar assembly	K02415	fliL; flagellar protein FliL	Cellular Processes	Cell motility	Flagellar assembly	33.8594	33.1151	13.7733	14.6923	<0.001	***
fliM	Resource acqisition	Flagellar assembly	K02416	fliM; flagellar motor switch protein FliM	Cellular Processes	Cell motility	Flagellar assembly	78.9614	81.9932	55.5114	54.7766	<0.001	***
fliN	Resource acqisition	Flagellar assembly	K02417	fliN; flagellar motor switch protein FliN	Cellular Processes	Cell motility	Flagellar assembly	20.8975	21.865	17.7325	18.6985	0.001	**
fliO	Resource acqisition	Flagellar assembly	K02418	fliO, fliZ; flagellar protein FliO/FliZ	Cellular Processes	Cell motility	Flagellar assembly	11.8458	13.5297	3.64272	4.4376	<0.001	***
fliP	Resource acqisition	Flagellar assembly	K02419	fliP; flagellar biosynthesis protein FliP	Cellular Processes	Cell motility	Flagellar assembly	57.9124	58.7939	41.4403	37.2023	<0.001	***
fliQ	Resource acqisition	Flagellar assembly	K02420	fliQ; flagellar biosynthesis protein FliQ	Cellular Processes	Cell motility	Flagellar assembly	32.5258	35.5891	16.7402	17.9753	<0.001	***
fliR	Resource acqisition	Flagellar assembly	K02421	fliR; flagellar biosynthesis protein FliR	Cellular Processes	Cell motility	Flagellar assembly	48.6613	54.1881	33.3781	31.7074	<0.001	***
fliS	Resource acqisition	Flagellar assembly	K02422	fliS; flagellar secretion chaperone FliS	Cellular Processes	Cell motility	Flagellar assembly	28.2696	30.0877	13.0045	13.1873	<0.001	***
fliT	Resource acqisition	Flagellar assembly	K02423	fliT; flagellar protein FliT	Cellular Processes	Cell motility	Flagellar assembly	0.17265	0.624	0.340425	0.21385	0.528
fbpA	Resource acqisition	Iron transport	K02012	afuA, fbpA; iron(III) transport system substrate-binding protein	Environmental Information Processing	Membrane transport	ABC transporters	221.728	223.941	315.952	303.966	<0.001	***
fbpB	Resource acqisition	Iron transport	K02011	afuB, fbpB; iron(III) transport system permease protein	Environmental Information Processing	Membrane transport	ABC transporters	270.708	273.613	343.745	337.225	<0.001	***
fbpC	Resource acqisition	Iron transport	K02010	afuC, fbpC; iron(III) transport system ATP-binding protein [EC:7.2.2.7]	Environmental Information Processing	Membrane transport	ABC transporters	666.842	676.595	636.706	640.894	0.001	**
ccmA	Resource acqisition	Siderophore synthesis and hydrolase	K02193	ccmA; heme exporter protein A [EC:7.6.2.5]	Environmental Information Processing	Membrane transport	ABC transporters	92.974	95.9865	56.7366	58.4753	<0.001	***
ccmB	Resource acqisition	Siderophore synthesis and hydrolase	K02194	ccmB; heme exporter protein B	Environmental Information Processing	Membrane transport	ABC transporters	171.862	181.581	166.063	160.446	<0.001	***
ccmC	Resource acqisition	Siderophore synthesis and hydrolase	K02195	ccmC; heme exporter protein C	Environmental Information Processing	Membrane transport	ABC transporters	199.301	195.228	187.16	188.364	0.023	*
ccmD	Resource acqisition	Siderophore synthesis and hydrolase	K02196	ccmD; heme exporter protein D	Environmental Information Processing	Membrane transport	ABC transporters	0.321025	0.629925	0	0	0.002	**
entA	Resource acqisition	Siderophore synthesis	K00216	entA; 2,3-dihydro-2,3-dihydroxybenzoate dehydrogenase [EC:1.3.1.28]	Metabolism	Metabolism of terpenoids and polyketides	Biosynthesis of siderophore group nonribosomal peptides	1.54767	1.29278	0.3585	0.669775	0.001	**
entC	Resource acqisition	Siderophore synthesis	K02361	entC; isochorismate synthase [EC:5.4.4.2]	Metabolism	Metabolism of terpenoids and polyketides	Biosynthesis of siderophore group nonribosomal peptides	24.9031	28.508	17.4675	17.386	<0.001	***
Note: Green asterisks indicate a higher abundance of genes in high-salinity soil, whereas gray asterisks indicate a higher abundance of genes in low-salinity soil. *P < 0.05. **P < 0.01. ***P < 0.001
